# Supplementary material for: Development of a diagnostic compatible BCG vaccine against Bovine tuberculosis
Source: Sci Rep. 2019 Nov 28;9:17791. doi: 10.1038/s41598-019-54108-y (PMC6882907; doi:10.1038/s41598-019-54108-y)
Supplement: Supplementary file 1 — Supplementary_information [file 41598_2019_54108_MOESM1_ESM.pdf]

## Development of a diagnostic compatible BCG vaccine against Bovine tuberculosis

Aneesh Chandran<sup>1</sup>, Kerstin Williams<sup>1</sup>, Tom Mendum<sup>1</sup>, Graham Stewart<sup>1</sup>, Simon Clark<sup>3</sup>, Sirine Zadi<sup>3</sup>, Neil McLeod<sup>3</sup>, Ann Williams<sup>3</sup>, Bernardo Villarreal-Ramos<sup>2</sup>, Martin Vordermeier<sup>2</sup>, Veerasamy Maroudam<sup>4</sup>, Aravind Prasad<sup>5</sup>, Neeraj Bharti<sup>5</sup>, Ruma Banerjee<sup>5</sup>, Sunitha Manjari<sup>5</sup>, Johnjoe McFadden<sup>1†</sup>

### Supplementary Data

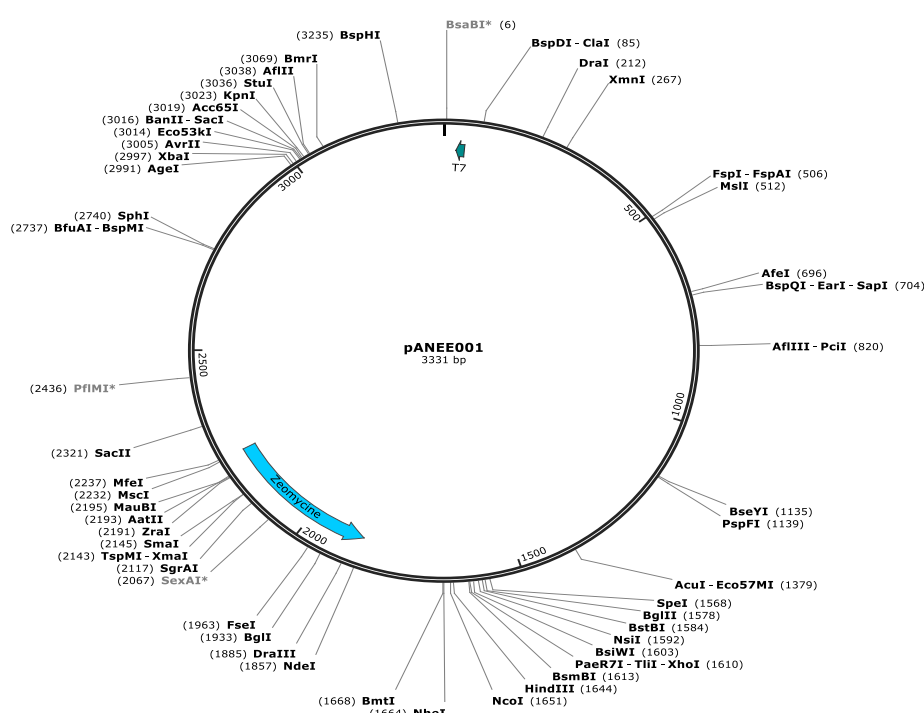

**Sup. Fig 1. The cosmid map of pANEE001.** The map was generated using Snap gene viewer. In this plasmid, Zeocin antibiotic cassette is flanked with MfeI and NdeI restriction sites at 3' and 5' respectively which enable the user to change the antibiotic cassette as required.

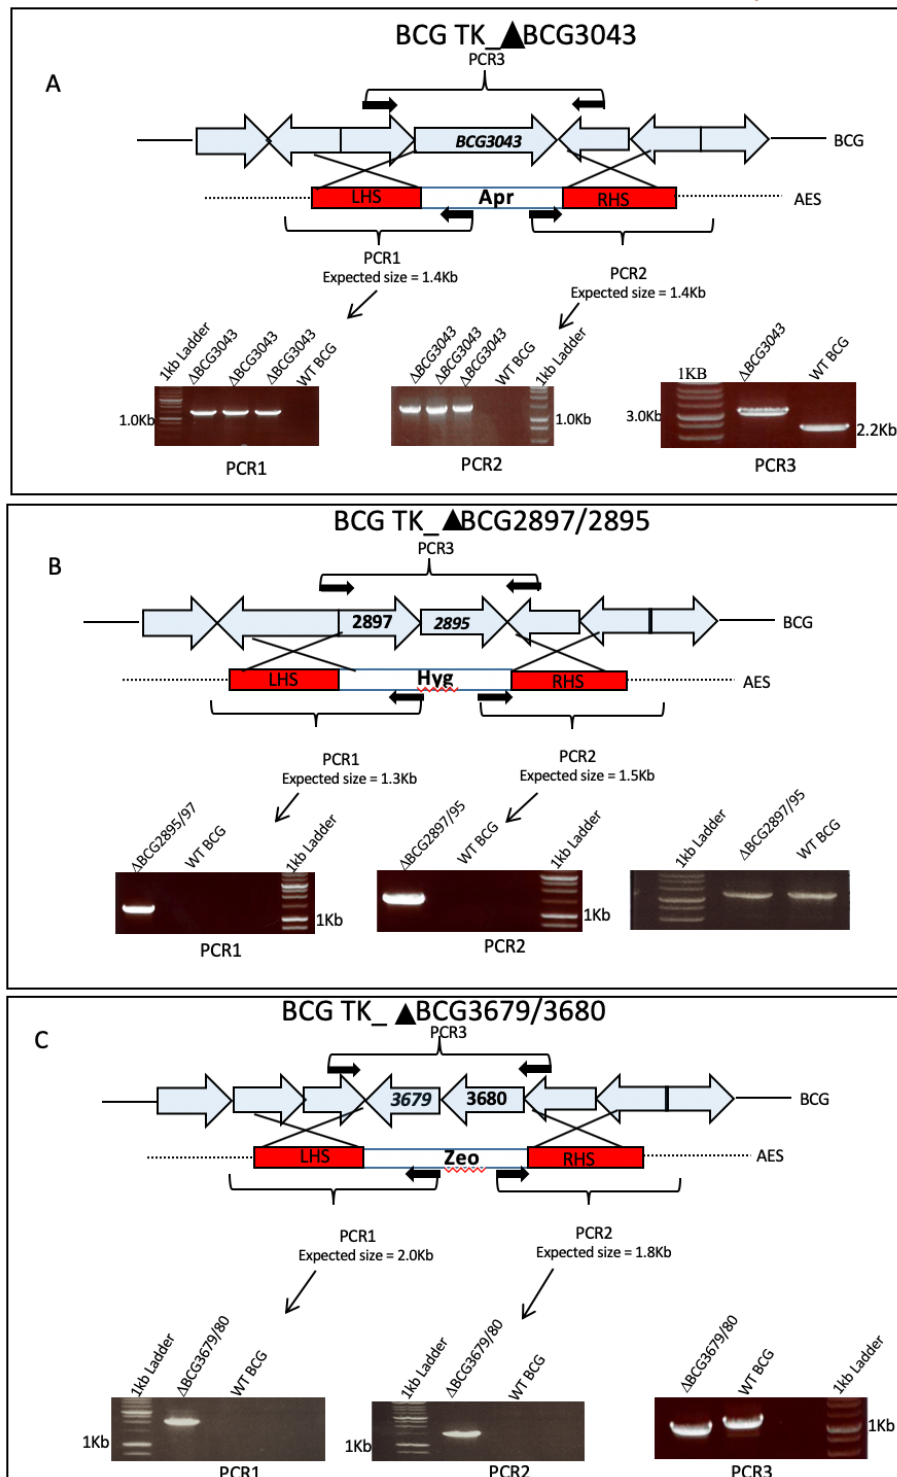

**Sup. Fig 2. Confirmation of  $\Delta$ BCG TK genotype by PCR.** (A) PCR products of the expected size were obtained for the mutants with BCG3043\_LF\_CHK\_R and BCG3043\_LF\_F (PCR1), and using BCG3043\_RF\_CHK\_R and BCG3043\_RF\_R (PCR2); no products were obtained with wild type (PCRs 1 & 2). PCR over the *BCG3043* gene using BCG3043\_LF\_F and BCG3043\_RF\_R further confirms the correct insertion of the Apramycine cassette (PCR3). (B) PCR products of the expected size were obtained for the mutants with MPB70/83\_LF\_CHK\_R and MPB70/83\_LF\_F (PCR1), and using MPB70/83\_RF\_CHK\_R and MPB70/83\_RF\_R (PCR2); no products were obtained with wild type (PCRs 1 & 2). PCR

over the *BCG2897/95* gene using MPB70/83\_LF\_F and MPB70/83\_RF\_R further confirms the correct insertion of the Hygromycin cassette (PCR3). (C) PCR products of the expected size were obtained for the mutants with BCG3679/80\_LF\_CHK\_R and BCG3679/80\_LF\_F (PCR1), and using BCG3679/80\_RF\_CHK\_R and BCG3679/80\_RF\_R (PCR2); no products were obtained with wild type (PCRs 1 & 2). PCR over the *BCG3679/80* gene using BCG3679/80\_LF\_F and BCG3679/80\_RF\_R further confirms the correct insertion of the Zeocin cassette (PCR3). All PCR products were run on 1% agarose gel and imaged using a UVP gel doc machine. The schematic representations of genes are not to the scale. The empty spaces around the edges of gel images were trimmed for better representation. The untrimmed version of gel images were given below with exact same order as above images in Sup. Fig 3.

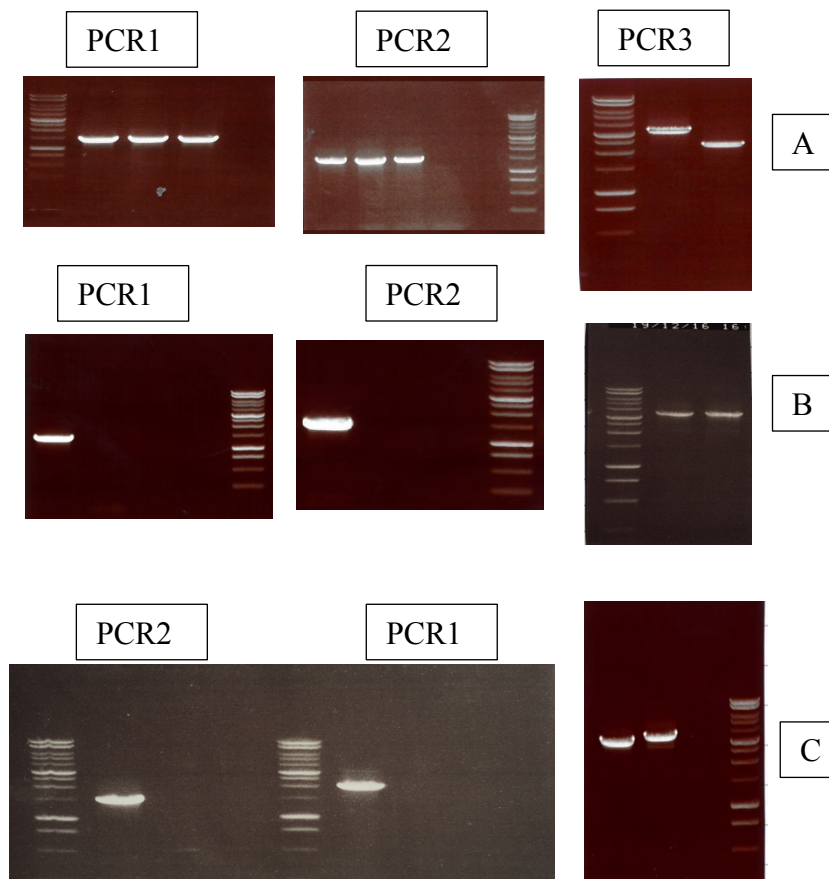

**Sup. Fig 3. Confirmation of  $\Delta$ BCG TK genotype by PCR.** The untrimmed version of gel images of Sup. Fig 2 representing in the exact same order as Sup. Fig. 2.

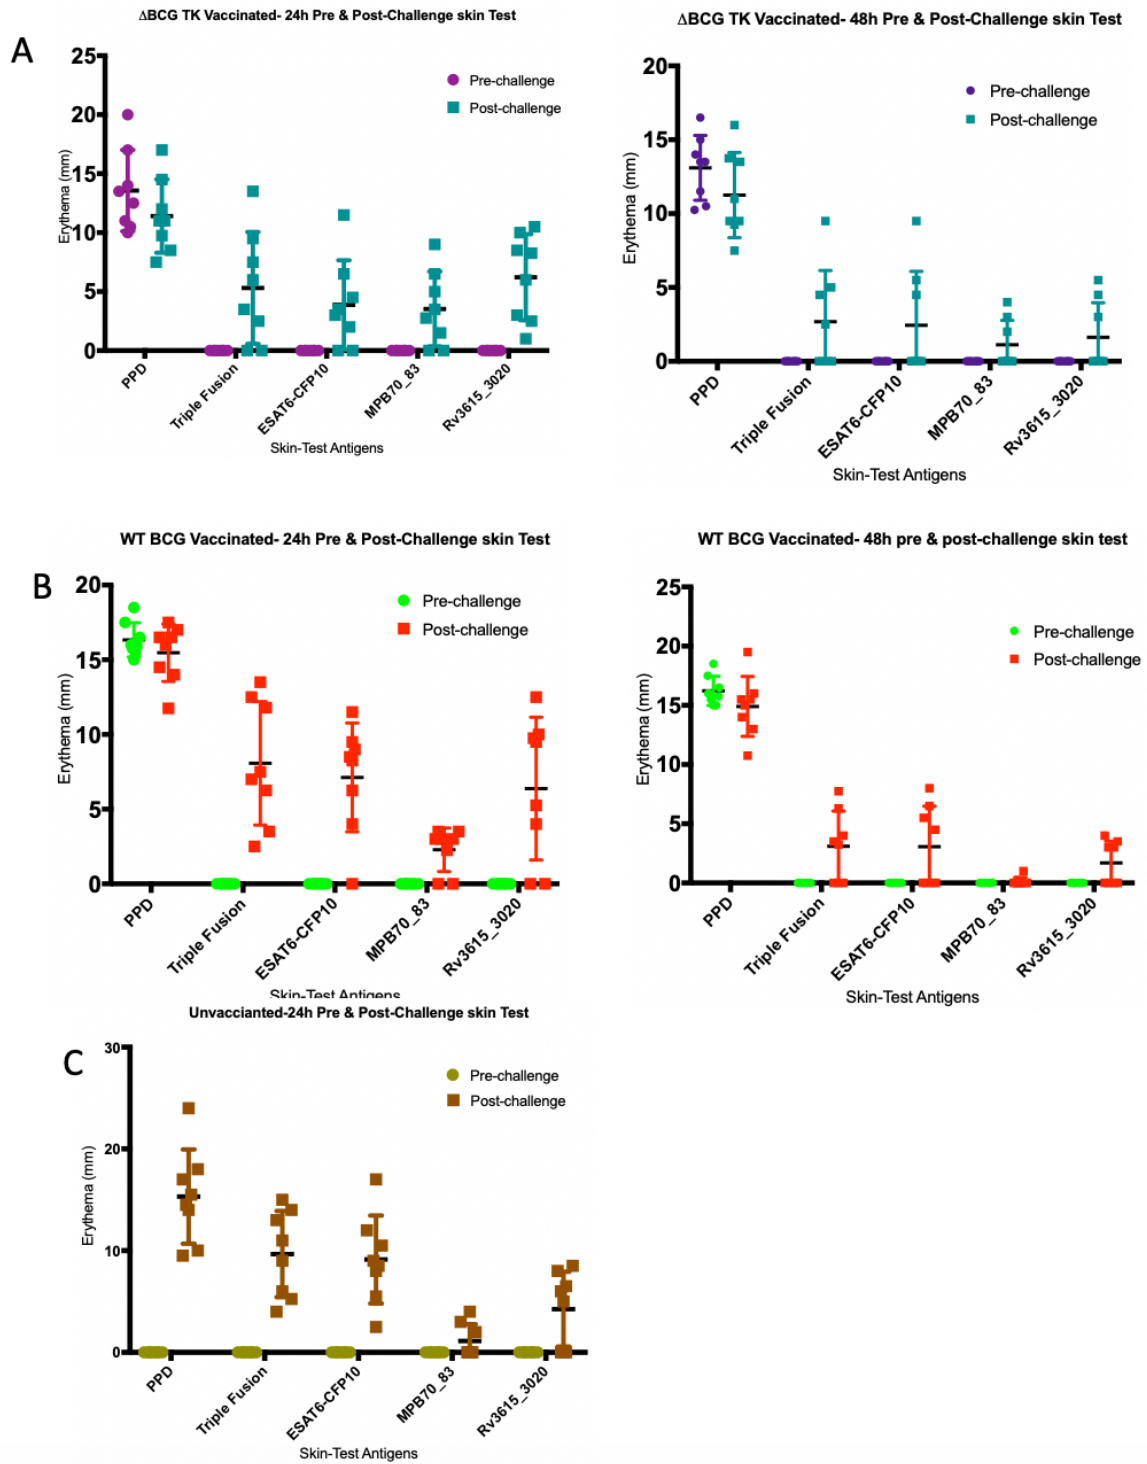

Sup. Fig 4: Pre- and Post- *M.bovis* challenge skin test at 24h and 48h against immunodominant antigens. (A, B) The size of erythema against PPD and Fusion antigens in the vaccinate guinea pigs, pre and post *M. bovis* challenge. (C) The size of erythema against PPD and Fusion antigens in the unvaccinated guinea pigs, pre and post *M. bovis* challenge. The error bars indicate standard deviation for each vaccine group.

| <b>Skin Test Group</b>    | <b>Antigens</b>               |
|---------------------------|-------------------------------|
| <b>A</b>                  | <b>PPD-B</b>                  |
| <b>B3 (Triple Fusion)</b> | <b>ESAT6-CFP10 Fusion</b>     |
|                           | <b>MPB70-MPB83 Fusion</b>     |
|                           | <b>Rv3615c-Rv3020c Fusion</b> |
| <b>C</b>                  | <b>ESAT6-CFP10 Fusion</b>     |
|                           | <b>PBS</b>                    |
| <b>D</b>                  | <b>MPB70-MPB83 Fusion</b>     |
| <b>E3</b>                 | <b>RV3615c-RV3020c Fusion</b> |

**Sup.Table1:** Details of the skin test antigens. The table list the antigen components for each skin test group

|                                                          |               |  | right flank     |    |    | left flank |    |    |
|----------------------------------------------------------|---------------|--|-----------------|----|----|------------|----|----|
|                                                          |               |  | Injection Sites |    |    |            |    |    |
| Vaccine                                                  | Guinea Pig ID |  | 1               | 2  | 3  | 4          | 5  | 6  |
| TK/<br>Vaccine Group 1<br>(ΔMPB70/83_ΔRv3615/16_ΔRv3020) | 53587         |  | A               | B3 | C  | D          | E3 | A  |
|                                                          | 46349         |  | B3              | C  | D  | E3         | A  | B3 |
|                                                          | 22385         |  | C               | D  | E3 | A          | B3 | C  |
|                                                          | 53970         |  | D               | E3 | A  | B3         | C  | D  |
|                                                          | 73412         |  | E3              | A  | B3 | C          | D  | E3 |
|                                                          | 73656         |  | A               | B3 | C  | D          | E3 | A  |
|                                                          | 53286         |  | B3              | C  | D  | E3         | A  | B3 |
|                                                          | 46461         |  | C               | D  | E3 | A          | B3 | C  |
|                                                          |               |  | right flank     |    |    |            |    |    |
|                                                          |               |  | Injection Sites |    |    |            |    |    |
| Vaccine                                                  | Guinea Pig ID |  | 1               | 2  | 3  | 4          | 5  | 6  |
| WT Danish Control/<br>Vaccine Group 2<br>(no knockouts)  | 22603         |  | A               | B3 | C  | D          | E3 | A  |
|                                                          | 27113         |  | B3              | C  | D  | E3         | A  | B3 |
|                                                          | 46267         |  | C               | D  | E3 | A          | B3 | C  |
|                                                          | 53393         |  | C               | D  | E3 | A          | B3 | C  |
|                                                          | 73404         |  | C               | A  | B3 | C          | D  | E3 |
|                                                          | 22504         |  | A               | B3 | C  | D          | E3 | A  |
|                                                          | 53775         |  | B3              | C  | D  | E3         | A  | B3 |
|                                                          | 53446         |  | C               | D  | E3 | A          | B3 | C  |
|                                                          |               |  | right flank     |    |    | left flank |    |    |
|                                                          |               |  | Injection Sites |    |    |            |    |    |
| Vaccine                                                  | Guinea Pig ID |  | 1               | 2  | 3  | 4          | 5  | 6  |
| Unvaccinated &<br>Challenged<br>Group 3                  | 23146         |  | A               | B3 | C  | D          | E3 | A  |
|                                                          | 46256         |  | B3              | C  | D  | E3         | A  | B3 |
|                                                          | 74064         |  | C               | D  | E3 | A          | B3 | C  |
|                                                          | 66922         |  | D               | E3 | A  | B3         | C  | D  |
|                                                          | 53568         |  | E3              | A  | B3 | C          | D  | E3 |
|                                                          | 73358         |  | A               | B3 | C  | D          | E3 | A  |
|                                                          | 26639         |  | B3              | C  | D  | E3         | A  | B3 |
|                                                          | 46990         |  | C               | D  | E3 | A          | B3 | C  |
|                                                          |               |  | right flank     |    |    | left flank |    |    |
|                                                          |               |  | Injection Sites |    |    |            |    |    |
| Vaccine                                                  | Guinea Pig ID |  | 1               | 2  | 3  | 4          | 5  | 6  |
| Unvaccinated &<br>Unchallenged<br>Group 4                | 46568         |  | A               | B3 | C  | D          | E3 | A  |
|                                                          | 73776         |  | B3              | C  | D  | E3         | A  | B3 |
|                                                          | 46761         |  | C               | D  | E3 | A          | B3 | C  |
|                                                          | 23009         |  | D               | E3 | A  | B3         | C  | D  |
|                                                          | 46343         |  | E3              | A  | B3 | C          | D  | E3 |
|                                                          | 46999         |  | A               | B3 | C  | D          | E3 | A  |
|                                                          | 46428         |  | B3              | C  | D  | E3         | A  | B3 |
|                                                          | 44387         |  | C               | D  | E3 | A          | B3 | C  |

**Sup. Table2:** Pre-challenge & post-challenge skin testing study design (Skin-testing injection Regime). Table shows the injection for each antigen preparations (coded A-E) for each group of animals. Antigen preparation group Key- A: PPD-B, B3: ESAT6-CFP10 fusion+MPB7—83 fusion+Rv3615c-3020 fusion(Triple fusion), C:ESAT6-CFP10 fusion, D: MPB70—83 fusion, E3:RV3615c-Rv3020c fusion

| Latin Square preliminary analysis |               |                                      |                                      |
|-----------------------------------|---------------|--------------------------------------|--------------------------------------|
| 24 hour TST reading               |               | General Linear model ANOVA (P value) |                                      |
|                                   |               | Pre-Challenge                        | Post-Challenge                       |
| Vaccine                           | Treatment     | Position on flank: signal of antigen | Position on flank: signal of antigen |
| TK                                | ΔBCG TK       | 0.792                                | 0.323                                |
| WT BCG                            | WT BCG strain | 0.339                                | 0.889                                |
| Unvaccinated + challenged         | Unvaccinated  | #                                    | 0.362                                |
| Unvaccinated + unchallenged       | Unvaccinated  | #                                    | 0.516                                |

  

| Latin Square preliminary analysis |               |                                      |                                      |
|-----------------------------------|---------------|--------------------------------------|--------------------------------------|
| 48 hour TST reading               |               | General Linear model ANOVA (P value) |                                      |
|                                   |               | Pre-Challenge                        | Post-Challenge                       |
| Vaccine                           | Treatment     | Position on flank: signal of antigen | Position on flank: signal of antigen |
| TK                                | ΔBCG TK       | 0.762                                | 0.072                                |
| WT BCG                            | WT BCG strain | 0.642                                | 0.074                                |
| Unvaccinated + challenged         | Unvaccinated  | #                                    | NA                                   |
| Unvaccinated + unchallenged       | Unvaccinated  | #                                    | 0.451                                |

**Sup. Table 3:** ANOVA general linear model (Latin square) statistical analysis to determine the effect of skin test flank location. The # symbol denotes the statistical analysis could not generate P value as all responses were 0. NA denotes not done

|                  |                                   |
|------------------|-----------------------------------|
| Zeo_casset_F     | GAACTCCAATTGATGGCCAAGTTGACCAAGTGC |
| Zeo_casset_R     | GAACTCCATATGTCAGTCCTGCTCCTCGGCCAC |
| pYUB_inv_F       | GACATC CAATTGTCACAGCGGACCTCTATTC  |
| pYUB_inv_R       | GATCTCCATATGAACTGGCGCAGTTCCTCTGG  |
| BCG3043_RF_F     | GATCTCAAGCTTTTCTTCCAATTCGAATC     |
| BCG3043_RF_R     | GATCTCACTAGTTGGTGGCGACGAATTC      |
| BCG3043_LF_F     | GATCTCCTTAAGCCAACCACGCCACATAC     |
| BCG3043_LF_R     | GATCTCTCTAGATGCTCGGAATGAAAAGG     |
| MPB70/83_RF_F    | GATCTCAAGCTTATGCCTCCGGCGTAATC     |
| MPB70/83_RF_R    | GATCTCACTAGTGAGCCCTGACCATTTC      |
| MPB70/83_LF_F    | GATCTCCTTAAGGCTCGTCAGCGACGGC      |
| MPB70/83_LF_R    | GATCTCTCTAGAACCAGTGATTCGGAGTG     |
| BCG3679/80_RF_F  | GATCTCAAGCTTCCTGACCACGTTTGCTGC    |
| BCG3679/80_RF_R  | GATCTCACTAGTCGTGCTCTATTAATGCTG    |
| BCG3679/80_LF_F  | GATCTCCTTAAGTCTATCAGTAGGCGGCTAG   |
| BCG3645/46_LF_R  | GATCTCTCTAGAACTGCGCTGCGACAATG     |
| BCG3043_RF_CHK_F | GTCGTTGCAGAGTGCGGTGG              |
| BCG3043_LF_CHK_R | CCAATAATGTTGAAACCCAGG             |

|                     |                       |
|---------------------|-----------------------|
| MPB70/83_RF_CHK_F   | CCAGCGATTCCTTGTTG     |
| MPB70/83_LF_CHK_R   | CAAAACACGAACAAGTGAGG  |
| BCG3679/80_RF_CHK_F | AAATCGCGTACGTGG       |
| BCG3679/80_RF_CHK_R | GAAGTGCACGCAGTTGCC    |
| BCG3679/80_LF_CHK_F | CAAGTTGACCAGTGCCGTTTC |
| BCG3679/80_LF_CHK_R | CAATTGAGTCATCCAGCG    |

**Sup. Table4:** Primers used in the study
